# Supplementary material for: Influence of cations in lithium and magnesium polysulphide solutions: dependence of the solvent chemistry
Source: Royal Society of Chemistry journal article supplement (doi:10.1039/c7cp01238a), 2017-01-01
Supplement: c7cp01238a1.pdf [file c7cp01238a1.pdf]

## Supporting Information

### **Influence of the Cation in Lithium and Magnesium Polysulphide Solutions in Dependence of the Solvent Chemistry**

Georg Bieker, Julia Wellmann, Martin Kolek, Kirsi Jalkanen, Martin Winter<sup>\*\*,#</sup>, and Peter Bieker<sup>\*</sup>

MEET Battery Research Centre, Institute of Physical Chemistry, University of Münster, Corrensstrasse 28/30,  
48149 Münster, Germany.

<sup>#</sup>Helmholtz Institute Münster (HI MS), IEK12, Forschungszentrum Jülich GmbH, Corrensstrasse 46, 48149  
Münster, Germany.

<sup>\*</sup>E-mail: [peter.bieker@uni-muenster.de](mailto:peter.bieker@uni-muenster.de)

<sup>\*\*</sup>Co-corresponding author: [Martin.Winter@uni-muenster.de](mailto:Martin.Winter@uni-muenster.de), [m.winter@fz-juelich.de](mailto:m.winter@fz-juelich.de)

## Preparation of the Mg and Li polysulphide solutions

The Mg polysulphide solutions were prepared as 1.0 mM stock solutions by stirring  $[\text{Mg}(\text{N-Melm})_6]\text{S}_8$  or  $[\text{Mg}(\text{DMSO})_6]\text{S}_8$  at 40°C for 7 d in the investigated solvents.

In order to increase accuracy upon weighing the sulphur and  $\text{Li}_2\text{S}$  powders, the “ $\text{LiS}_8$ ” solutions were prepared at a higher concentration of 10 mM. Stoichiometric amounts of  $\text{Li}_2\text{S}$  and sulphur were stirred in the investigated solvent at 40 °C for 4 d, after which the solutions were diluted to 1 mM and stirred for another 3 d at 40°C. The total preparation time of 7 d is comparable to the preparation of the Mg polysulphide solutions. However, due to their slower dissolution rate, the 10 mM “ $\text{LiS}_8$ ” samples in ACN and  $\text{Pyr}_{14}\text{TFSI}$  were stirred for 9 d at 40°C in order to achieve a complete dissolution. After a complete dissolution, also these solutions were diluted to a concentration of 1.0 mM and stirred for another 3 d at 40°C.

The Mg and Li 1.0 mM stock solutions were diluted to 0.5 mM, 0.2 mM, and 0.1 mM samples directly before measuring the UV/Vis absorption spectra.

## UV/Vis studies

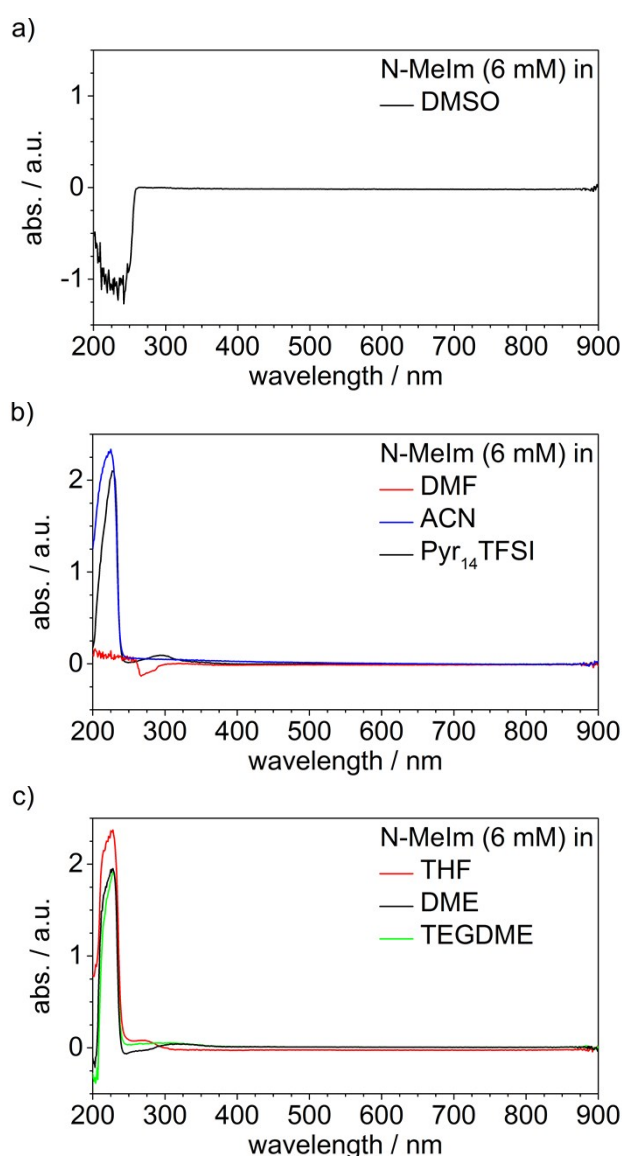

Figure S1: UV/Vis spectra of N-Melm (6 mM) in a) DMSO, b) DMF, ACN, and  $\text{Pyr}_{14}\text{TFSI}$ , and c) THF, DME, and TEGDME.

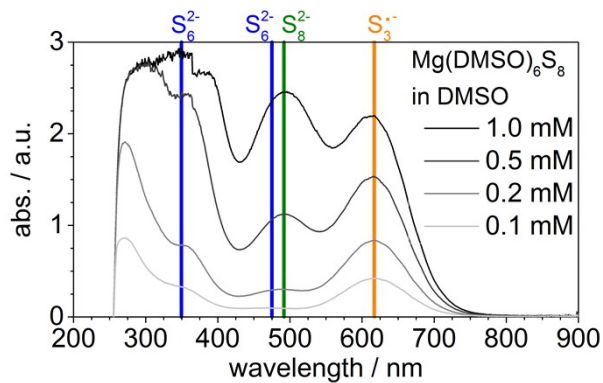

Figure S2: UV/Vis spectra of  $\text{Mg}(\text{DMSO})_6\text{S}_8$  solutions in DMSO.

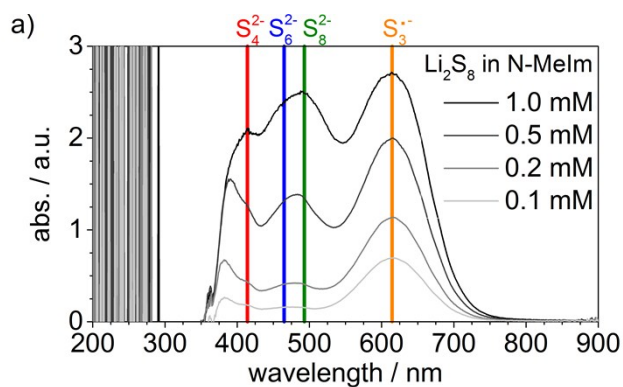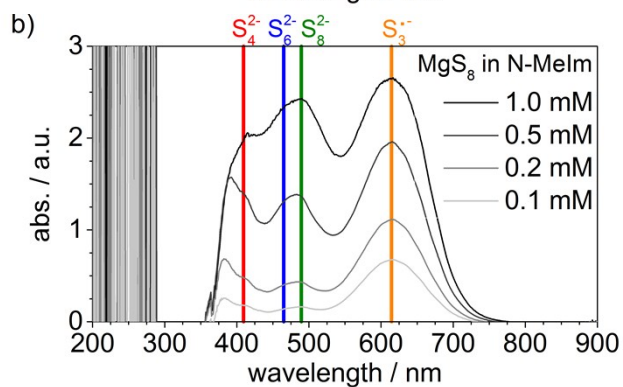

Figure S3: UV/Vis spectra of a)  $\text{Li}_2\text{S}_8$  and b)  $\text{MgS}_8$  solutions in N-Melm.

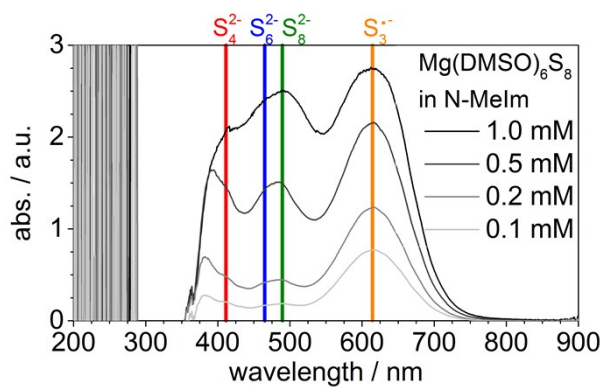

Figure S4: UV/Vis spectra of  $\text{Mg}(\text{DMSO})_6\text{S}_8$  solutions in N-Melm.
